# Supplementary material for: Molecular Typing, Antibiotic Resistance and Enterotoxin Gene Profiles of Staphylococcus aureus Isolated from Humans in South Korea
Source: MDPI journal article supplement (doi:10.3390/microorganisms10030642), 2022-03-17
Supplement: s1 [file s1]

**Table S1.** PCR primer pairs used to detect enterotoxin genes in *S. aureus* strains and their predicted amplification size.

| Target gene | Primer Sequence (5'-3')  | Product size (bp) | Reference                |
|-------------|--------------------------|-------------------|--------------------------|
| sea         | GCAGGGAACAGCTTTAGGC      | 520               | Monday and Bohach (1999) |
|             | GTTCTGTAGAAGTATGAAACACG  |                   |                          |
| seb         | ATGTAATTTTGATATTCGCAGTG  | 643               |                          |
|             | TGCAGGCATCATATCATACCA    |                   |                          |
| sec         | CTTGTATGTATGGAGGAATAACA  | 283               |                          |
|             | A                        |                   |                          |
| sed         | TGCAGGCATCATATCATACCA    | 384               |                          |
|             | GTGGTGAAATAGATAGGACTGC   |                   |                          |
| see         | ATATGAAGGTGCTCTGTGG      | 170               |                          |
|             | TACCAATTAACCTTGTGGATAGAC |                   |                          |
| seg         | CTCTTTGCACCTTACCGC       | 327               |                          |
|             | CGTCTCCACCTGTTGAAGG      |                   |                          |
|             | CCAAGTGATTGTCTATTGTCG    |                   |                          |

#### Reference

28. Monday, SR; Bohach, GA. Use of multiplex PCR to detect classical and newly described pyrogenic toxin genes in *Staphylococcal* isolates. *Journal of Clinical Microbiology*. 1999, 37(10), 3411-3414.
